# Supplementary material
Source: Springer Nature journal article supplement (https://www.springermedizin.de/resource/supplementary/12894_2011_185_MOESM1_ESM.pdf/9513142)

**A**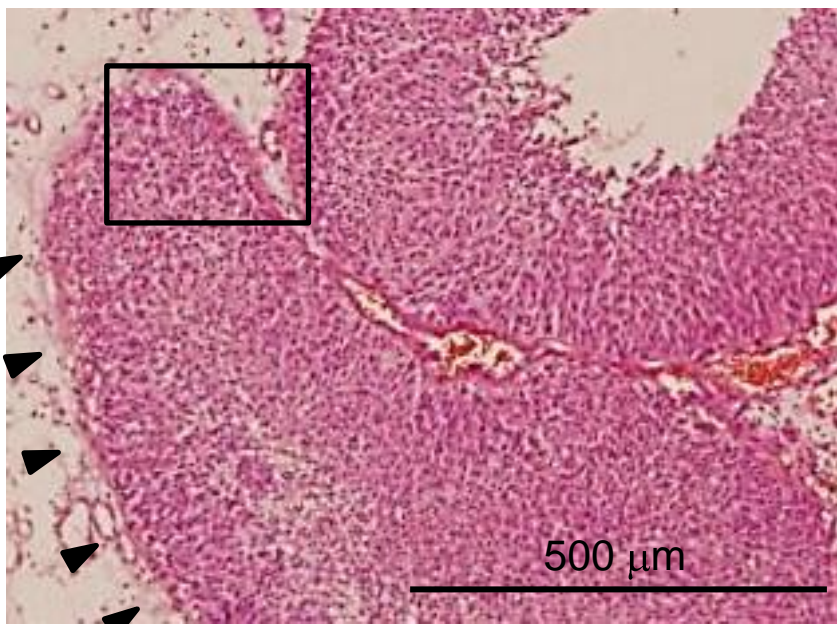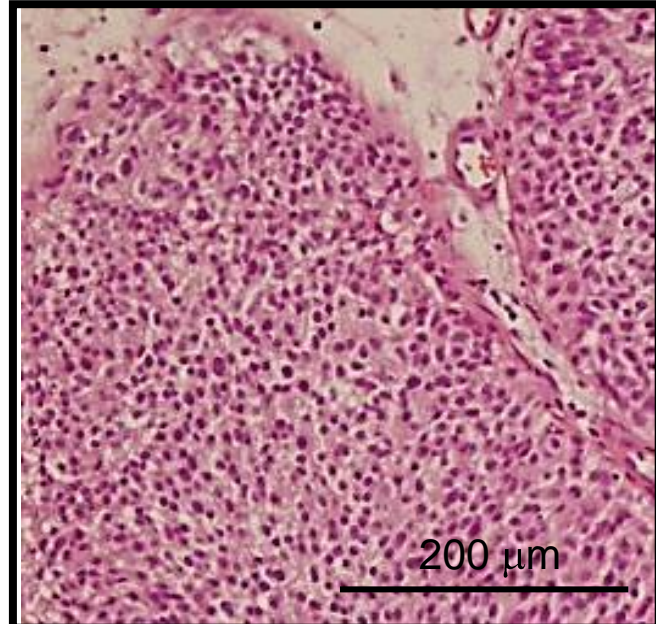**B**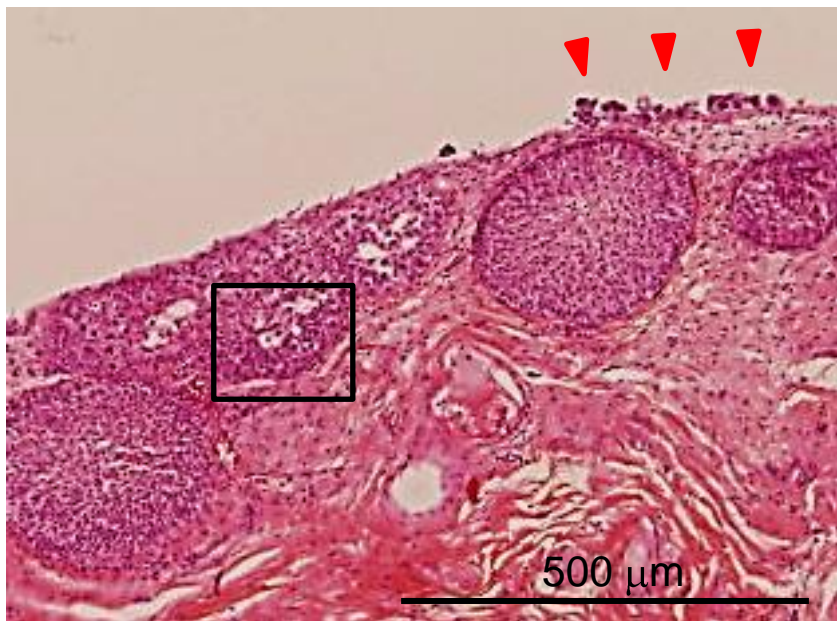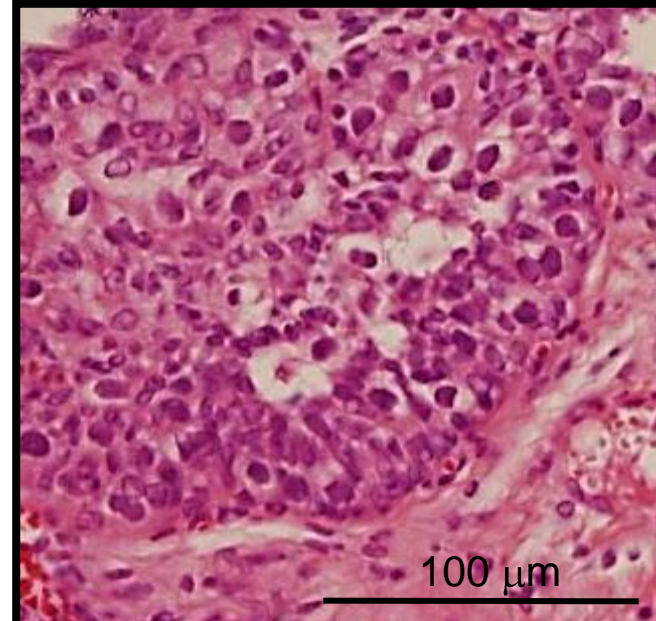

Supplement: MOESM1 [file 9513142]
